# Supplementary material for: Mechanisms of Kale (Brassica oleracea var. acephala) Tolerance to Individual and Combined Stresses of Drought and Elevated Temperature
Source: Int J Mol Sci. 2022 Sep 29;23(19):11494. doi: 10.3390/ijms231911494 (PMC9570052; doi:10.3390/ijms231911494)
Supplement: Supplementary file 1 [file ijms-23-11494-s001.zip › Table S1.xlsx]

## Sheet: Sheet1
Table S1. Screening of 33 accessions of kale (Brassica oleracea var. acephala) under stress conditions (osmotic stress M, elevated temperature T, and combined stress TM) compared to the control (C) based on biomass accumulation, root length, water content and proline level. One-way ANOVA followed by LSD test were applied to find whether there were differences between the control and treatment gro…
	Biomass (mg)				Root length (cm)																Water content (%)				Proline (μg/mg DW)
	C	M	T	TM	C				M				T				TM				C	M	T	TM	C				M				T				TM
	MEAN	MEAN	MEAN	MEAN	MEAN		SE		MEAN		SE		MEAN		SE		MEAN		SE		MEAN	MEAN	MEAN	MEAN	MEAN		SE		MEAN		SE		MEAN		SE		MEAN		SE
IPT413	37.9412	17.5882	30.9412	17.9412	6.26976	±	0.429389	a	2.11159	±	0.411209	c	3.64476	±	0.381235	b	1.74794	±	0.260714	c	88.6357	72.709	85.4373	75.9672	2.51084	±	0.43022	b	14.2972	±	1.69033	a	2.28309	±	0.397292	b	13.3986	±	2.09526	a
IPT202	37.2	18.5714	32.1429	16.4286	5.3772	±	0.363664	a	2.30947	±	0.382397	bc	2.69657	±	0.33936	b	1.2058	±	0.230695	c	89.7849	73.4615	86.6667	70.4348	1.74388	±	0.334963	b	9.83364	±	0.594767	a	3.13843	±	1.95294	b	10.7787	±	0.649287	a
IPT206	38.6667	15.8824	32.5	19.4737	4.843	±	0.454839	a	3.04575	±	0.25704	b	2.70975	±	0.279228	b	2.47281	±	0.220082	b	89.4828	72.5926	87.8846	74.3243	3.961	±	0.0402974	c	10.0758	±	0.548967	b	3.02453	±	0.251178	c	18.6807	±	2.04805	a
IPT379	48.75	22.5	36.875	23.75	6.55331	±	0.247301	a	3.13194	±	0.28752	b	3.05364	±	0.368375	b	1.188	±	0.170191	c	87.8205	56.9444	93.75	58.9474	5.22017	±	0.216529	b	6.76342	±	0.953927	ab	5.48877	±	0.940192	b	9.1307	±	0.579199	a
IPT380	40	14.1176	34.4444	15	5.45607	±	0.343353	a	2.60712	±	0.313074	bc	3.06569	±	0.148311	b	1.69856	±	0.259967	c	90.1389	70.8333	88.3871	69.5833	1.41334	±	0.0562185	b	14.6803	±	0.159637	a	1.97379	±	0.127939	b	13.7887	±	0.725706	a
IPT381	33.75	16.87	24.37	17.37	5.5885	±	0.455543	a	2.35969	±	0.325652	b	2.97906	±	0.401882	b	0.327	±	0.24364	c	88.3333	74.0741	86.6667	69.7842	1.08375	±	0.0417898	b	7.73594	±	0.332892	a	1.75362	±	0.0710658	b	6.91472	±	0.473816	a
IPT383	50.57	23.33	36.67	22.22	5.52469	±	0.455242	a	1.99719	±	0.335732	b	3.23755	±	0.563681	b	2.28675	±	0.31734	b	87.9944	75.7143	84.5455	75.25	3.16946	±	0.248047	b	6.52508	±	0.584443	a	3.24343	±	0.0545818	b	5.56907	±	0.249678	a
IPT384	34.2105	15.5556	32.7778	17.2222	4.4858	±	0.391871	a	2.20744	±	0.24654	b	2.82719	±	0.27707	b	2.12231	±	0.204084	b	87.2308	63.9286	86.5763	94.4444	3.15135	±	0.107573	c	6.44665	±	1.00855	b	3.96726	±	0.549695	b	16.3679	±	0.736172	a
IPT385	28.0625	11.6667	24.8125	11.3125	4.98731	±	0.389523	a	2.47012	±	0.27582	b	3.22	±	0.205089	bc	1.76362	±	0.221647	c	91.9822	77.7143	89.6725	93.75	0.121395	±	0.121395	b	12.033	±	0.271672	a	1.59093	±	0.00794724	b	11.8297	±	0.663001	a
IPT386	40	20.5556	35.7895	22.2222	6.53311	±	0.342195	a	2.99294	±	0.363222	bc	3.72476	±	0.263026	b	2.47447	±	0.249385	c	89.7222	72.4324	87.3529	63	0.96205	±	0.0610499	c	7.45428	±	0.950344	a	1.47568	±	0.0819906	c	4.71303	±	0.409722	b
IPT387	24.5625	12.6875	21.4375	12.4375	4.90075	±	0.442942	a	1.26756	±	0.264486	c	3.75825	±	0.264237	b	1.58	±	0.244266	c	89.0585	70.4433	88.0466	93.75	1.90713	±	0.154853	c	14.5569	±	0.606515	a	1.62952	±	0.103277	c	8.40408	±	0.850077	b
IPT388	32.7273	19.5	32	18.7647	4.11791	±	0.398185	a	2.01875	±	0.312287	b	2.24083	±	0.32159	b	1.727	±	0.216939	b	86.6667	71.7949	85.6771	56.7398	3.56952	±	0.599465	c	14.1658	±	1.04032	a	2.7172	±	0.24141	c	8.21439	±	0.119734	b
IPT390	57.5	20.8333	37.22	21.6667	5.34155	±	0.435402	a	2.40233	±	0.475448	b	3.22675	±	0.257812	b	2.30583	±	0.397034	b	89.5652	60.8	84.7761	72.3077	2.04759	±	0.428556	c	5.52432	±	0.775741	b	3.45933	±	0.120693	c	12.8069	±	0.256767	a
IPT391	41.2	20.8667	33.5714	19.8667	5.978	±	0.275038	a	3.732	±	0.300889	b	2.92455	±	0.451729	bc	1.95867	±	0.26081	c	88.5113	72.524	82.3404	73.8255	2.58893	±	0.124848	d	16.6335	±	0.31298	a	6.42842	±	0.139356	c	14.9351	±	0.246932	b
IPT392	52.5	25.625	42.5	24.375	6.66188	±	0.319171	a	1.4795	±	0.447549	c	4.04631	±	0.282355	b	0.450875	±	0.145492	c	89.7619	74.1463	88.2353	71.5385	0.756576	±	0.0883314	c	10.7096	±	0.204431	a	1.22343	±	0.144078	c	9.23653	±	0.188674	b
IPT393	27.5	13.8462	24	12	4.87353	±	0.307344	a	1.94198	±	0.280916	c	3.79466	±	0.237339	b	2.24481	±	0.305837	c	93.1818	80	91.6667	80	0.663032	±	0.0119131	c	11.0103	±	0.407925	a	1.14377	±	0.151653	c	6.82171	±	0.381299	b
IPT394	50	25	42	21	5.0706	±	0.429087	a	1.95643	±	0.327933	b	2.9735	±	0.406228	b	2.1244	±	0.258616	b	90	66	86.5079	75.7143	3.17234	±	0.138832	d	13.909	±	0.995561	b	8.86266	±	0.351553	c	19.6933	±	1.46823	a
IPT395	48.6667	20	35.3333	20	6.76162	±	0.208001	a	2.14813	±	0.38277	c	4.022	±	0.27069	b	1.81	±	0.386309	c	92.8767	77.5	88.3019	65.7143	0.556401	±	0.179127	c	9.67969	±	0.264941	a	1.90958	±	0.0720707	c	5.70708	±	0.968524	b
IPT396	32.8125	16.4375	28.1875	16.1875	6.48325	±	0.363297	a	1.9525	±	0.354441	c	4.47306	±	0.238733	b	1.33913	±	0.3617	c	91.0476	73.7643	86.2528	93.75	1.51098	±	0.0539576	c	11.0637	±	0.30295	b	1.95555	±	0.110079	c	12.873	±	0.174569	a
IPT397	22.1667	9.36364	19.8333	8.33333	5.13508	±	0.418021	a	2.81709	±	0.362185	bc	3.55383	±	0.299233	b	1.62783	±	0.196112	c	91.5414	82.1359	92.521	91.6667	0.733182	±	0.160833	b	8.60163	±	1.11627	a	1.29848	±	0.17382	b	8.59167	±	0.410275	a
IPT398	41.9375	19.0625	30.5	18.0625	5.75994	±	0.420223	a	2.21144	±	0.350061	c	3.52562	±	0.296279	b	1.20837	±	0.211339	d	90.1639	73.1148	87.7049	93.75	2.46639	±	0.0864894	b	16.7977	±	0.800208	a	3.62444	±	0.385657	b	18.8993	±	0.887926	a
IPT399	36.1	21.4545	26.2222	24.6316	6.52463	±	0.48226	a	4.0979	±	0.398783	b	4.08028	±	0.372927	b	2.20811	±	0.2547	c	89.7091	75.4237	82.7754	84.9573	2.70197	±	0.655936	b	15.7376	±	2.42845	a	6.5213	±	0.832552	b	8.60303	±	2.98442	ab
IPT401	34	14.6667	30.6667	11.875	5.60453	±	0.478714	a	3.0366	±	0.340897	b	3.9305	±	0.268839	b	0.93175	±	0.121147	c	91.7647	71.8182	90.2174	56.8421	1.18783	±	0.0587997	c	11.0095	±	0.3987	a	2.10726	±	0.182982	c	7.70237	±	0.186802	b
IPT402	40	19.1429	30	17.2727	7.06747	±	0.224381	a	3.67171	±	0.436089	b	4.55938	±	0.281426	b	2.298	±	0.20281	c	90.7667	80.3731	88.5882	69	1.27646	±	0.0369949	c	9.83505	±	0.572094	a	1.46801	±	0.0974123	c	4.72491	±	0.444058	b
IPT403	32.0588	16.8667	25.2941	14.9412	6.06982	±	0.394323	a	2.69118	±	0.308865	bc	3.56219	±	0.273524	b	2.15412	±	0.157754	c	88.4587	75.415	85.907	73.5039	1.93027	±	0.229922	c	12.2184	±	1.0484	a	2.04609	±	0.218997	c	6.05898	±	0.499558	b
IPT404	58.4	28.7143	48.8667	28	6.052	±	0.625161	a	4.24792	±	0.466458	ab	4.51214	±	0.456473	a	2.46087	±	0.263274	b	90.0342	77.2886	88.0764	75.3867	2.41878	±	0.558946	c	19.8715	±	2.33599	a	6.09013	±	0.65455	b	20.861	±	1.65098	a
IPT405	41.8235	20.2857	35.8824	19.3846	6.56676	±	0.200541	a	3.63625	±	0.321942	b	4.09829	±	0.297131	b	2.4945	±	0.284638	c	90.4782	77.7465	88.1639	71.5873	1.25481	±	0.508541	b	10.6335	±	1.3495	a	2.62862	±	0.590841	b	10.9052	±	1.5251	a
IPT406	25.0556	11.75	25.8333	10.6	4.0675	±	0.372366	a	1.97944	±	0.266543	c	3.01839	±	0.112703	b	1.77672	±	0.200329	c	93.3703	70.9574	91.5699	78.3648	0.713894	±	0.0239234	b	9.4526	±	2.37435	a	1.16499	±	0.0151711	b	4.79619	±	1.81428	ab
IPT408	39.9	20.3	32.8	19	6.1583	±	0.663367	a	3.4951	±	0.423592	b	3.6744	±	0.542846	b	2.4372	±	0.451685	b	89.1729	66.8473	86.0061	72.8947	3.91553	±	0.204277	b	15.7382	±	1.21856	a	3.32576	±	0.262053	b	18.9721	±	1.86232	a
IPT411	45.3846	15.6	48.4667	20.6667	5.13923	±	0.332013	a	3.05286	±	0.334721	c	4.22733	±	0.325543	b	2.862	±	0.251692	c	88.1356	57.265	88.7208	73.871	2.7427	±	0.207332	b	18.912	±	0.423544	a	3.09625	±	0.67908	b	16.6376	±	4.3669	a
IPT414	40	16.8125	36.4375	19.5625	3.76407	±	0.412082	a	3.24213	±	0.336078	ab	3.18675	±	0.248422	a	2.74106	±	0.335973	a	88.2333	75.8364	88.3705	74.8243	2.64419	±	0.0279944	b	13.6471	±	1.18123	a	2.14794	±	0.362746	b	14.1694	±	0.91836	a
IPT416	56.0714	24.5455	49.0667	26.8889	5.41343	±	0.778665	a	1.70407	±	0.53648	b	4.1478	±	0.402805	a	1.11887	±	0.330273	b	89.5796	75.9259	89.2391	75.2066	3.39916	±	0.36862	b	18.6807	±	2.15817	a	2.28153	±	0.288455	b	20.5188	±	1.8227	a
IPT423	25.4	13.4	21.3333	13.2	5.854	±	0.340994	a	3.286	±	0.295522	b	3.90733	±	0.274741	b	2.82	±	0.308115	b	89.2388	75.1244	91.0165	72.7273	1.39725	±	0.104259	c	12.7501	±	1.10504	a	1.11447	±	0.130202	c	7.86667	±	0.636046	b
