# Supplementary material for: Mechanisms of Kale (Brassica oleracea var. acephala) Tolerance to Individual and Combined Stresses of Drought and Elevated Temperature
Source: Int J Mol Sci. 2022 Sep 29;23(19):11494. doi: 10.3390/ijms231911494 (PMC9570052; doi:10.3390/ijms231911494)
Supplement: Supplementary file 1 [file ijms-23-11494-s001.zip › Table S2.xlsx]

## Sheet: Sheet1
Table S2. Multiple variate analysis made on all measured parameters in four selected kale (B. oleracea var. acephala) accessions (392, 395, 404, 411) under abiotic stress treatments (osmotic stress, elevated temperature and combined stress). Abbreviations: catalase activity (CAT), antioxidant activity measured by DPPH (DPPH), total phenolics (TPC), total flavonoids (TF), total glucosinolates (GLS…
Variable
	VIP	Importance	Component 1	Component 2
CAT	1.66265	1	2.9593	3.04319
Proline	1.47957	2	-2.15348	-4.0565
PIabs	1.35013	3	-3.21738	2.00688
DPPH	1.23175	4	-3.43363	1.377
H2O2	1.21545	5	-2.78628	-1.31218
Fructose	1.17608	6	3.40017	-0.910253
Root growth	1.13239	7	-0.890164	-1.05822
TPC	1.09821	8	2.88497	-1.5649
Fv/Fm	1.07057	9	-2.91456	2.15946
TF	0.957762	10	1.35763	-4.50246
GLS	0.931169	11	2.87335	-3.85869
NAC041	0.90231	12	2.62008	-1.39399
GSH	0.860041	13	2.45991	-0.679245
Glucose	0.850866	14	-2.05317	2.25159
HSFA2	0.798253	15	2.31153	-2.22173
FOS	0.759308	16	2.13594	-0.192314
NAC084	0.695573	17	-1.45446	-0.976751
Trehalose + Sucrose	0.635102	18	-0.0644669	4.12307
Total sugars	0.621567	19	0.162345	-2.65829
DREB2A	0.498544	20	-0.520117	-2.38799
HSFA7	0.478508	21	1.32623	-2.78498
MDA	0.429468	22	-0.176199	-0.0195876
