# Supplementary material for: Mechanisms of Kale (Brassica oleracea var. acephala) Tolerance to Individual and Combined Stresses of Drought and Elevated Temperature
Source: Int J Mol Sci. 2022 Sep 29;23(19):11494. doi: 10.3390/ijms231911494 (PMC9570052; doi:10.3390/ijms231911494)
Supplement: Supplementary file 1 [file ijms-23-11494-s001.zip › Table S3.xlsx]

## Sheet: Sheet1
Table S3. Expression analysis heat stress-related transcription factors HSFA2, HSFA7 and DREB2A of Brassica oleracea var. acephala accessions 392, 395 404 and 411 in response to osmotic (M), temperature (T) and combined osmotic and temperature stress (TM) measured by qPCR (ΔΔCq). Gene expression was calculated according to Livak and Schmittgen (2001) and presented as fold change compared to the c…
		HSFA2			HSFA7				DREB2A
Accession	Treatment	Mean	SE	LSD	Mean	SE	LSD		Mean	SE	LSD
392	C	1	0.02	b	1	0.06	c		1	0.06	b
	M	4.89	1.34	b	7.93	4.51	c		4.68	0.44	b
	T	345.83	57.7	a	487.98	69.94	a		35.35	6.6	a
	TM	80.12	19.95	b	123.95	54.96	b		7.92	2.31	b
395	C	1.01	0.07	b	1.04	0.13	b		1.03	0.12	b
	M	11.94	5.36	b	0.25	0.08	b		2.39	0.72	b
	T	561.88	241.51	a	17.71	7.02	a		11.24	3.63	ab
	TM	444.14	19.61	ab	5.55	1.99	b		20.95	8.02	a
404	C	1.01	0.05	b	1.05	0.15	b		1.01	0.08	b
	M	2.4	0.33	b	0.55	0.12	b		4.63	1.32	b
	T	148.66	49.2	a	202.65	95.98	a		21.64	3.03	ab
	TM	159.73	31.39	a	147.86	73.93	ab		38.06	15.61	a
411	C	1.01	0.05	b	1.01	0.07	b		1	0.02	b
	M	49.71	30.01	ab	1.09	0.29	b		8.8	1.55	ab
	T	124.58	54.87	a	88.3	28.96	a		8.93	1.31	ab
	TM	57.24	24.3	ab	29.56	4.55	b		14.48	6.42	a
